# Supplementary material for: Cr2(NCN)3, a ferromagnetic carbodiimide with an unusual two-step magnetic transition
Source: Royal Society of Chemistry journal article supplement (doi:10.1039/c6nj02498j), 2016-01-01
Supplement: c6nj02498j1.pdf [file c6nj02498j1.pdf]

**Supplement to**

**Cr<sub>2</sub>(NCN)<sub>3</sub>, a ferromagnetic carbodiimide with an unusual two-step magnetic transition**

Kjersti B. Sterri,<sup>a</sup> Claire Besson,<sup>a,b</sup> Andreas Houben,<sup>a</sup> Philipp Jacobs,<sup>a</sup> Markus Hoelzel,<sup>c</sup> and  
Richard Dronskowski<sup>a,\*</sup>

<sup>a</sup> Institute of Inorganic Chemistry, RWTH Aachen University, Landoltweg 1, 52056  
Aachen, Germany

<sup>b</sup> Department of Chemistry, The George Washington University, 800 22nd street NW,  
Washington DC 20052, USA (current address)

<sup>c</sup> Forschungsneutronenquelle Heinz Maier-Leibnitz (FRM II), Technische Universität  
München, Lichtenbergstrasse, 85747 Garching, Germany

\* Corresponding author. E-mail: drons@HAL9000.ac.rwth-aachen.de

**Table 1:** Parameters attained from the Rietveld refinement of the neutron powder diffraction data of  $\text{Cr}_2(\text{NCN})_3$ .

| $T$ (K)                              | 220         | 150         | 108         |
|--------------------------------------|-------------|-------------|-------------|
| Space group                          |             | $R\bar{3}c$ |             |
| $a$ (Å)                              | 5.47771(7)  | 5.47792(7)  | 5.48006(7)  |
| $c$ (Å)                              | 28.0070(3)  | 28.0039(3)  | 27.9977(3)  |
| $V$ (Å <sup>3</sup> )                | 727.773(15) | 727.747(15) | 728.154(15) |
| Refined pattern range, $2\theta$ (°) |             | 8.00–151.90 |             |
| $R_p$                                | 0.0278      | 0.0287      | 0.0311      |
| $R_{\text{Bragg}}$                   | 0.0602      | 0.0604      | 0.0590      |
| Magnetic space group                 |             |             | $P\bar{1}$  |
| magnetic moment, $\mu_B$             |             |             | 1.47(12)    |
| $R_{\text{Bragg, magn}}$             |             |             | 0.191       |

**Table 2:** Equivalent displacement parameters  $U_{\text{eq}}$  (Å<sup>2</sup>) in  $\text{Cr}_2(\text{NCN})_3$  measured at  $T = 220$ , 150 and 108 K.

| Atom | Wyckoff position | $T$ (K) | $x$       | $y$       | $z$        | $U_{\text{eq}}$ (Å <sup>2</sup> ) |
|------|------------------|---------|-----------|-----------|------------|-----------------------------------|
|      |                  | 220     |           |           |            |                                   |
| Cr   | 12c              |         | 0         | 0         | 0.1662(4)  | 0.017(2)                          |
| C    | 18e              |         | 0.3249(6) | 0         | ¼          | 0.0165(13)                        |
| N    | 36f              |         | 0.6377(4) | 0.0017(5) | 0.04040(3) | 0.0187(7)                         |
|      |                  | 150     |           |           |            |                                   |
| Cr   | 12c              |         | 0         | 0         | 0.1663(4)  | 0.015(2)                          |
| C    | 18e              |         | 0.3250(6) | 0         | ¼          | 0.0143(12)                        |
| N    | 36f              |         | 0.6373(3) | 0.0021(5) | 0.04044(3) | 0.0172(7)                         |
|      |                  | 108     |           |           |            |                                   |
| Cr   | 12c              |         | 0         | 0         | 0.1658(3)  | 0.014(2)                          |
| C    | 18e              |         | 0.3220(6) | 0         | ¼          | 0.0110(12)                        |
| N    | 36f              |         | 0.6368(3) | 0.0013(5) | 0.04035(3) | 0.0164(7)                         |

**Table 3:** Anisotropic displacement parameters  $U_{\text{ani}}$  ( $\text{\AA}^2$ ) in  $\text{Cr}_2(\text{NCN})_3$  measured at  $T = 4, 108, 150, 220$  and  $300$  K.

| Atom | Wyckoff position | $T$ (K) | $U_{11}$   | $U_{22}$   | $U_{33}$   | $U_{12}$   | $U_{13}$   | $U_{23}$   |
|------|------------------|---------|------------|------------|------------|------------|------------|------------|
|      |                  | 300     |            |            |            |            |            |            |
| Cr   | 12c              |         | 0.024(2)   | 0.024(2)   | 0.0097(18) | 0.012(2)   | 0          | 0          |
| C    | 18e              |         | 0.0185(11) | 0.033(2)   | 0.0047(8)  | 0.016(2)   | -0.0042(7) | -0.0084(7) |
| N    | 36f              |         | 0.0340(10) | 0.0176(6)  | 0.0100(4)  | 0.0110(9)  | 0.0043(7)  | 0.0035(7)  |
|      |                  | 220     |            |            |            |            |            |            |
| Cr   | 12c              |         | 0.021(2)   | 0.021(2)   | 0.0093(18) | 0.010(2)   | 0          | 0          |
| C    | 18e              |         | 0.0156(11) | 0.0297(20) | 0.0043(8)  | 0.0148(20) | -0.0045(7) | -0.0089(7) |
| N    | 36f              |         | 0.0301(10) | 0.0170(6)  | 0.0091(4)  | 0.0099(9)  | 0.0040(7)  | 0.0033(7)  |
|      |                  | 150     |            |            |            |            |            |            |
| Cr   | 12c              |         | 0.018(2)   | 0.018(2)   | 0.0092(18) | 0.009(2)   | 0          | 0          |
| C    | 18e              |         | 0.0139(11) | 0.0254(19) | 0.0035(8)  | 0.0127(19) | -0.0030(6) | -0.0061(6) |
| N    | 36f              |         | 0.0293(10) | 0.0149(6)  | 0.0076(4)  | 0.0091(9)  | 0.0043(7)  | 0.0028(7)  |
|      |                  | 108     |            |            |            |            |            |            |
| Cr   | 12c              |         | 0.016(2)   | 0.016(2)   | 0.0093(19) | 0.008(2)   | 0          | 0          |
| C    | 18e              |         | 0.0099(10) | 0.0186(18) | 0.0047(7)  | 0.0093(18) | -0.0028(6) | -0.0057(6) |
| N    | 36f              |         | 0.0291(10) | 0.0156(6)  | 0.0045(4)  | 0.0101(9)  | 0.0040(7)  | 0.0026(6)  |
|      |                  | 4       |            |            |            |            |            |            |
| Cr   | 12c              |         | 0.0095(18) | 0.0095(18) | 0.0030(17) | 0.0048(18) | 0          | 0          |
| C    | 18e              |         | 0.0096(10) | 0.0157(16) | 0.0031(7)  | 0.0078(16) | -0.0023(6) | -0.0046(6) |
| N    | 36f              |         | 0.0196(9)  | 0.0157(6)  | 0.0040(4)  | 0.0036(9)  | 0.0045(6)  | 0.0021(6)  |

**Table 4:** Bond lengths (Å) and angles (°) for Cr<sub>2</sub>(NCN)<sub>3</sub>.

| <i>T</i> (K)            | 300                                                                      | 220                                                                      | 150                                                                      | 108                                                                      | 4                                                                        |
|-------------------------|--------------------------------------------------------------------------|--------------------------------------------------------------------------|--------------------------------------------------------------------------|--------------------------------------------------------------------------|--------------------------------------------------------------------------|
| Cr...N                  | 2.092(7) × 3<br>2.080(6) × 3                                             | 2.085(7) × 3<br>2.083(6) × 3                                             | 2.081(6) × 3<br>2.085(6) × 3                                             | 2.091(5) × 3<br>2.074(5) × 3                                             | 2.086(5) × 3<br>2.077(5) × 3                                             |
| Cr...C                  | 2.953(9) × 3<br>2.961(9) × 3                                             | 2.945(9) × 3<br>2.968(9) × 3                                             | 2.943(9) × 3<br>2.969(9) × 3                                             | 2.945(7) × 3<br>2.964(7) × 3                                             | 2.946(7) × 3<br>2.964(7) × 3                                             |
| N–C                     | 1.2108(9) × 2                                                            | 1.2110(9) × 2                                                            | 1.2101(9) × 2                                                            | 1.2120(9) × 2                                                            | 1.2124(9) × 2                                                            |
| Cr...Cr<br>(intralayer) | 3.1644(2)                                                                | 3.1626(1)                                                                | 3.1628(1)                                                                | 3.1643(2)                                                                | 3.1653(2)                                                                |
| Cr...Cr<br>(interlayer) | 4.710(16)                                                                | 4.694(16)                                                                | 4.688(16)                                                                | 4.715(12)                                                                | 4.708(12)                                                                |
| N...Cr...N              | 92.6(3) × 3<br>92.4(3) × 3<br>81.3(3) × 3<br>94.2(3) × 3<br>172.3(3) × 3 | 92.7(3) × 3<br>92.6(3) × 3<br>81.3(3) × 3<br>93.9(3) × 3<br>172.2(3) × 3 | 92.7(3) × 3<br>92.8(3) × 3<br>81.2(3) × 3<br>93.8(3) × 3<br>172.0(3) × 3 | 92.5(2) × 3<br>92.7(2) × 3<br>81.1(2) × 3<br>94.2(3) × 3<br>171.9(3) × 3 | 92.5(2) × 3<br>92.8(2) × 3<br>81.0(2) × 3<br>94.2(3) × 3<br>171.8(3) × 3 |
| N–C–N                   | 176.11(13)                                                               | 175.98(13)                                                               | 175.62(13)                                                               | 177.46(13)                                                               | 176.50(13)                                                               |
| Cr...N–C                | 124.6(6) × 3<br>126.2(6) × 3                                             | 124.5(6) × 3<br>126.5(6) × 3                                             | 124.7(6) × 3<br>126.5(6) × 3                                             | 124.0(5) × 3<br>126.9(5) × 3                                             | 124.4(5) × 3<br>126.6(5) × 3                                             |

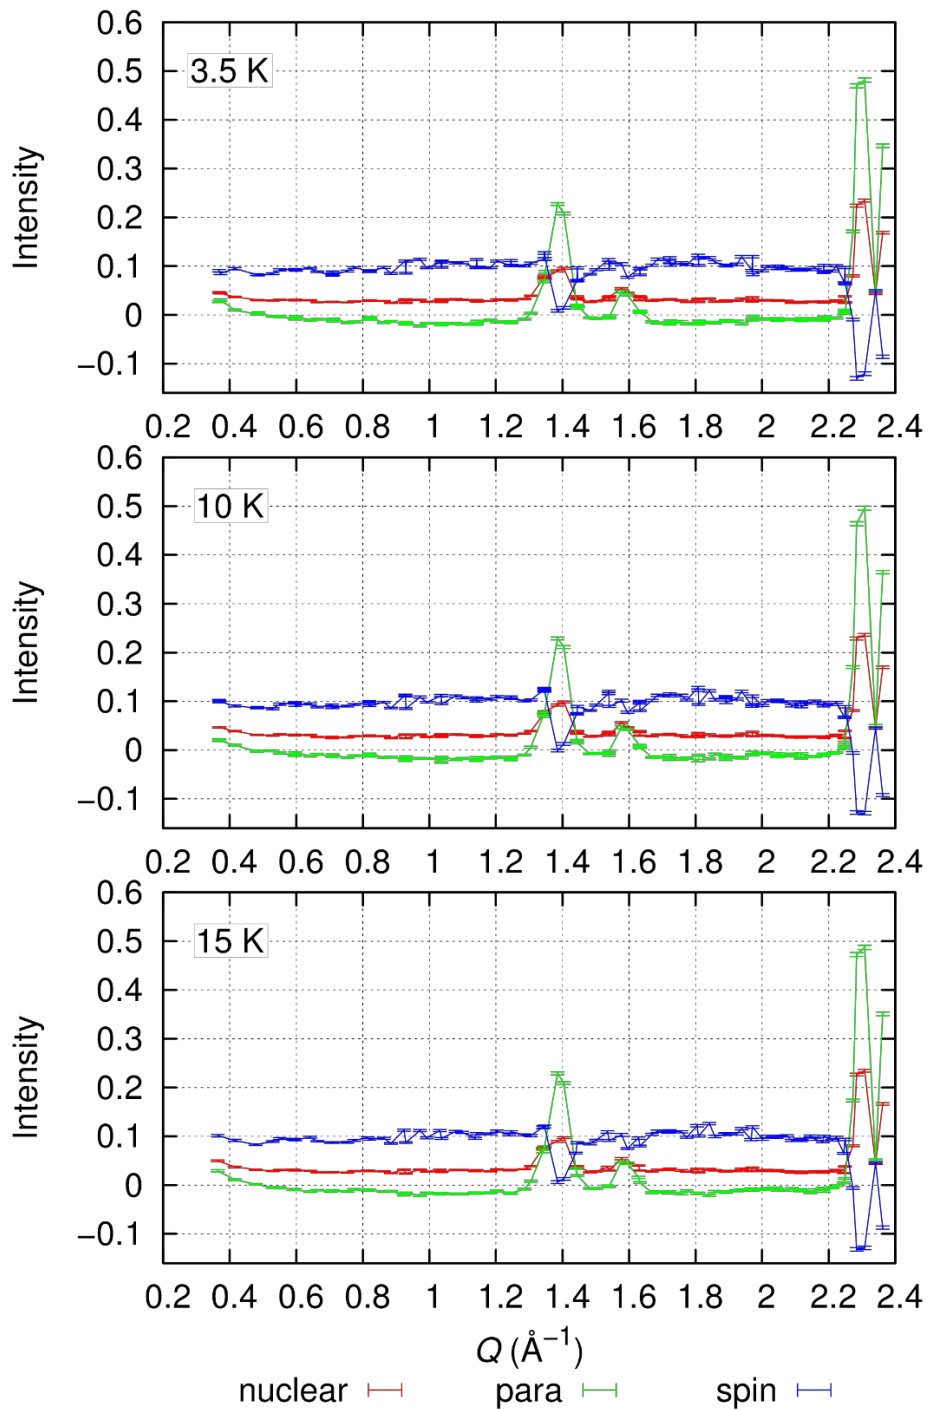

**Fig. S1:** Preliminary spin-polarized neutron powder diffractograms of  $\text{Cr}_2(\text{NCN})_3$  conducted at  $T = 3.5$  (top), 10 (middle), and 15 K (bottom). Only the low-angle region is measured involving the (006), (012), (104) and (110) reflections. Due to the resolution of the instrument only one reflection is observed for the (006) and (012) reflections. The measurements were performed at the cold diffuse neutron spectrometer (DNS) at the research neutron source Heinz Maier-Leibnitz (FRM II), in Garching, Germany.

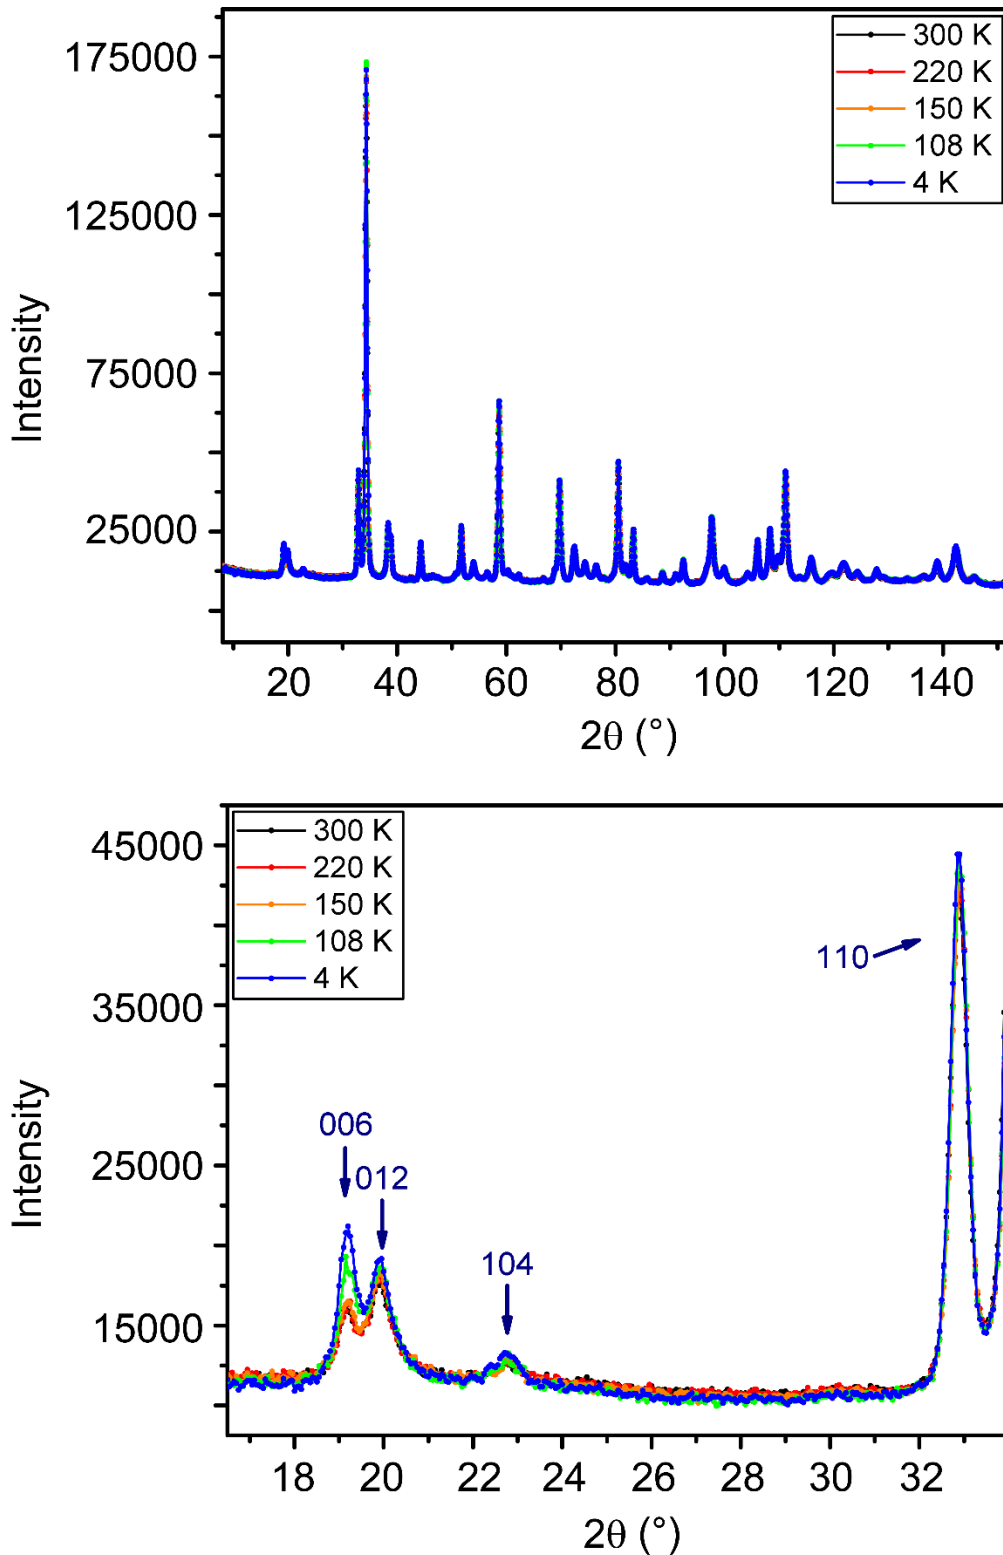

**Fig. S2:** Neutron powder diffractograms of  $\text{Cr}_2(\text{NCN})_3$  collected at  $T = 4, 108, 150, 220$  and  $300$  K (top), with focus on the (006) and (012) reflections (bottom). Due to shorter measurement time at  $T = 108$  K intensities are corrected for comparison with the other measurements.

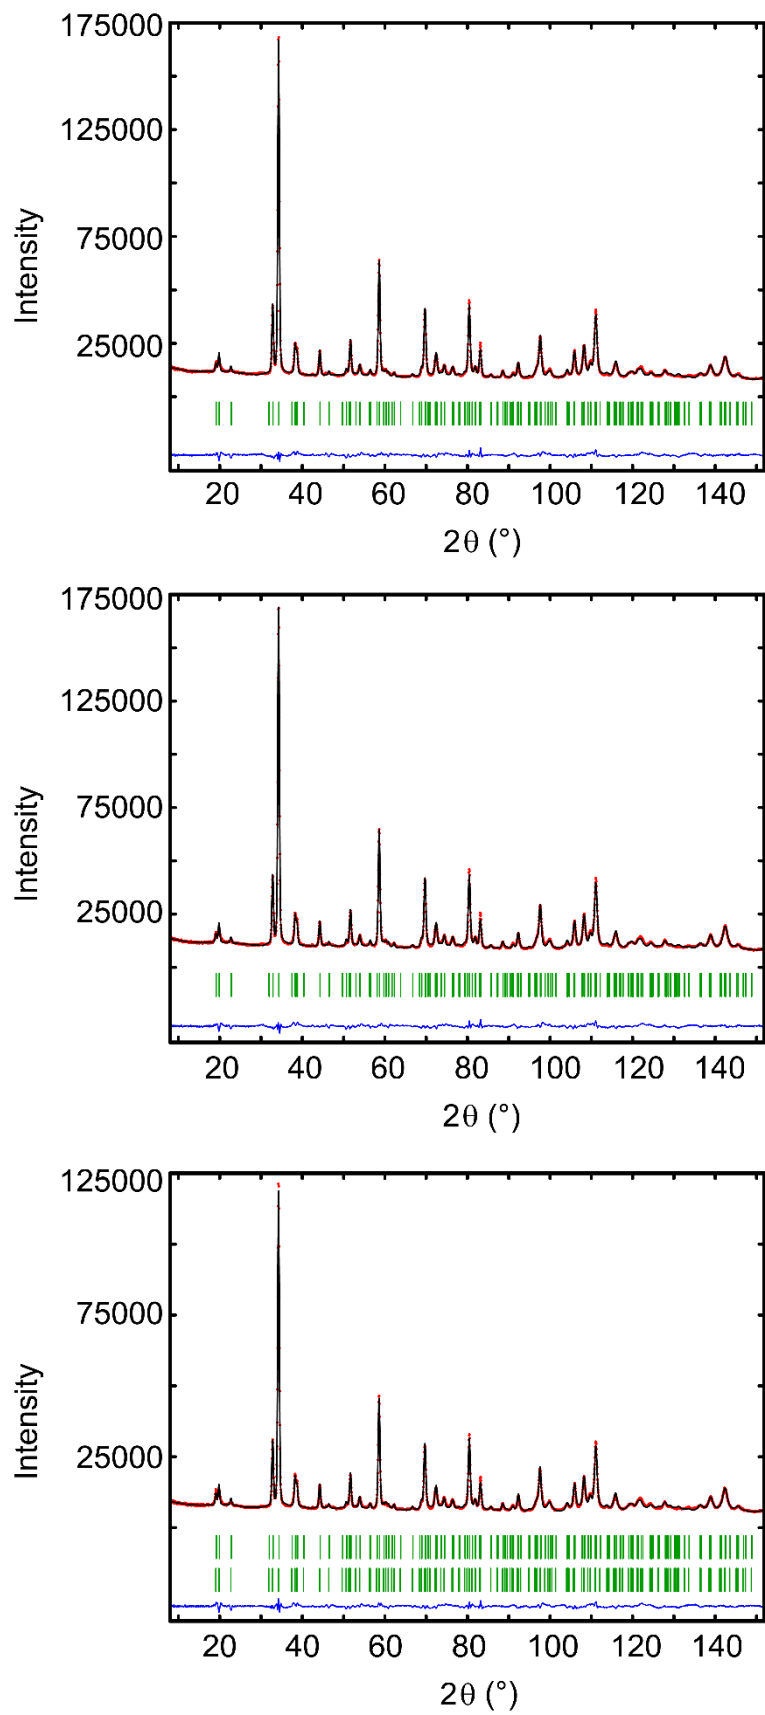

**Fig. S3:** Rietveld refinement plot of  $\text{Cr}_2(\text{NCN})_3$  at  $T = 220$  (top), 150 (middle) and 108 K (bottom).
